# Supplementary material for: Intermittent screening and treatment for malaria complementary to routine immunisation in the first year of life in Papua, Indonesia: a cluster randomised superiority trial
Source: Springer Nature journal article supplement (doi:10.1186/s12916-022-02394-1), 2022-06-08
Supplement: MOESM1 [file 23140544]

## **Additional file 1**

Supplement to: **Intermittent screening and treatment for malaria in the first year of life in Papua, Indonesia: a cluster randomised superiority trial**

### **Table of contents**

|                                                         |    |
|---------------------------------------------------------|----|
| 1. Infant Malaria laboratory diagnosis by methods ..... | 2  |
| 2. Infant and Maternal Clusters.....                    | 3  |
| 3. Dosing Regiments.....                                | 4  |
| 4. Statistical Analysis Plan.....                       | 5  |
| 5. Severe Adverse Events .....                          | 8  |
| 6. Maternal Malaria Table.....                          | 13 |

## 1. Infant Malaria laboratory diagnosis by methods

| <b>At 6 Months</b>  |            | <b>Microscopy</b> |           |           |              |
|---------------------|------------|-------------------|-----------|-----------|--------------|
| <b>RDT</b>          | Negative   | Pf                | Pv        | Pf and Pv | <b>Total</b> |
| Negative            | 661        | 0                 | 0         | 0         | <b>661</b>   |
| Pf                  | 0          | 5                 | 2         | 0         | <b>7</b>     |
| Pf and Pv           | 0          | 0                 | 0         | 0         | <b>0</b>     |
| <b>Total</b>        | <b>661</b> | <b>5</b>          | <b>2</b>  | <b>0</b>  | <b>668</b>   |
|                     |            |                   |           |           |              |
|                     |            |                   |           |           |              |
| <b>At 12 Months</b> |            | <b>Microscopy</b> |           |           |              |
| <b>RDT</b>          | Negative   | Pf                | Pv        | Pf and Pv | <b>Total</b> |
| Negative            | 609        | 0                 | 3         | 0         | <b>612</b>   |
| Pf                  | 6          | 6                 | 6         | 0         | <b>18</b>    |
| Pf and Pv           | 0          | 0                 | 0         | 0         | <b>0</b>     |
| <b>Total</b>        | <b>615</b> | <b>6</b>          | <b>9</b>  | <b>0</b>  | <b>630</b>   |
|                     |            |                   |           |           |              |
|                     |            |                   |           |           |              |
| <b>At 12 Months</b> |            | <b>PCR</b>        |           |           |              |
| <b>RDT</b>          | Negative   | Pf                | Pv        | Pf and Pv | <b>Total</b> |
| Negative            | 527        | 55                | 14        | 2         | <b>598</b>   |
| Pf                  | 3          | 4                 | 3         | 0         | <b>10</b>    |
| Pf and Pv           | 0          | 0                 | 0         | 0         | <b>0</b>     |
| <b>Total</b>        | <b>530</b> | <b>59</b>         | <b>17</b> | <b>2</b>  | <b>608</b>   |
|                     |            |                   |           |           |              |
|                     |            |                   |           |           |              |
| <b>At 12 Months</b> |            | <b>PCR</b>        |           |           |              |
| <b>Microscopy</b>   | Negative   | Pf                | Pv        | Pf and Pv | <b>Total</b> |
| Negative            | 529        | 55                | 12        | 2         | <b>598</b>   |
| Pf                  | 0          | 4                 | 0         | 0         | <b>4</b>     |
| Pv                  | 0          | 0                 | 5         | 0         | <b>5</b>     |
| Pf and Pv           | 0          | 0                 | 0         | 0         | <b>0</b>     |
| <b>Total</b>        | <b>529</b> | <b>59</b>         | <b>17</b> | <b>2</b>  | <b>607</b>   |

## 2. Infant and Maternal Clusters

| Cluster | Village Health Post   | Infant's group | Maternal Group | Population | API   |
|---------|-----------------------|----------------|----------------|------------|-------|
| 1       | Kamoro Jaya (SP1)     | PCD            | <b>IPT</b>     | 4762       | 23,1  |
| 10      | Naena Muktipura (SP6) | IST            | <b>IPT</b>     | 1661       | 21,67 |
| 5       | Sempan (Inauga)       | PCD            | <b>IPT</b>     | 17868      | 23,11 |
| 20      | Karang Senang (SP3)   | IST            | <b>IPT</b>     | 3294       | 35,52 |
| 21      | Utikini Baru (SP12)   | PCD            | <b>IPT</b>     | 1849       | 35,15 |
| 3       | Kwamki Baru           | IST            | <b>IPT</b>     | 20849      | 59,8  |
| 17      | Tipuka                | PCD            | <b>IPT</b>     | 277        | 32,49 |
| 6       | Wonosari Jaya (SP4)   | PCD            | <b>IST</b>     | 3072       | 23,11 |
| 2       | Koperapoka            | IST            | <b>IST</b>     | 25024      | 24,5  |
| 11      | Wangirja (SP9)        | PCD            | <b>IST</b>     | 805        | 22,36 |
| 9       | Mulia Kencana (SP7)   | IST            | <b>IST</b>     | 1441       | 21,51 |
| 16      | Poumako               | PCD            | <b>IST</b>     | 635        | 72,44 |
| 13      | Kadun Jaya            | IST            | <b>IST</b>     | 1051       | 39,96 |
| 18      | Wania                 | IST            | <b>IST</b>     | 519        | 34,68 |
| 4       | Nawaripi              | PCD            | <b>SST</b>     | 1729       | 23,13 |
| 7       | Harapan Baru          | IST            | <b>SST</b>     | 14147      | 23,11 |
| 8       | Mware                 | PCD            | <b>SST</b>     | 738        | 21,68 |
| 15      | Pigapu (Logpong)      | IST            | <b>SST</b>     | 335        | 23,88 |
| 14      | Kaugapu               | PCD            | <b>SST</b>     | 712        | 40,73 |
| 12      | Hiripau               | IST            | <b>SST</b>     | 817        | 33,05 |
| 19      | Bhintuka (SP13)       | PCD            | <b>SST</b>     | 1477       | 42,65 |

Notes: PCD=Passive Case Detection, IST=Intermittent Screening and Treatment, IPT=Intermittent Preventive Treatment

### 3. Dosing Regiments

**Dihydroartemisinin-Piperaquine** (each tablet containing 40 mg dihydroartemisinin and 320 mg piperaquine) will be given orally at 0, 24 and 48 hours.

The target minimum total dose of DHA is 6mg/kg and piperaquine 57mg/kg.

For infants weighing 3 to 17 kg this is given as a solution of 1 tablet crushed and dissolved in 5ml of clean water and administered by syringe.

| WEIGHT | DHP SOLUTION | WEIGHT | DHP TABLETS |
|--------|--------------|--------|-------------|
| 3 KG   | 1.0 ML       | 18 KG  | 1.5 TABLETS |
| 4 KG   | 1.3 ML       | 19 KG  | 1.5 TABLETS |
| 5 KG   | 1.5 ML       | 20 KG  | 1.5 TABLETS |
| 6 KG   | 1.8 ML       | 21 KG  | 1.5 TABLETS |
| 7 KG   | 2.1 ML       | 22 KG  | 1.5 TABLETS |
| 8 KG   | 2.4 ML       | 23 KG  | 1.5 TABLETS |
| 9 KG   | 2.7 ML       | 24 KG  | 1.5 TABLETS |
| 10 KG  | 3.0 ML       |        |             |
| 11 kg  | 3.3 ml       |        |             |
| 12 kg  | 3.6 ml       |        |             |
| 13 kg  | 3.9 ml       |        |             |
| 14 kg  | 4.2 ml       |        |             |
| 15 kg  | 4.5 ml       |        |             |
| 16 kg  | 4.8 ml       |        |             |
| 17 kg  | 5.0 ml       |        |             |

If infants unable to tolerate oral treatment (vomiting) that requires discontinuation of study treatment, intravenous quinine or unsupervised 7 day quinine plus clindamycin will be given. Dose: quinine 10 mg/kg body weight 3 times/day and clindamycin 5 mg/kg body weight 3 times/day for 7 days. This must be recorded in the CRF as **adverse experience(s)** along with the treatment given.

**Rescue medication.** Patients who fail to respond to the trial drug will be given unsupervised quinine and clindamycin treatment for 7 days (Dose: quinine 10 mg/kg body weight 3 times/day and clindamycin 5 mg/kg body weight 3 times/day). Parasitological and clinical response will be checked at day 3 and 7 after the commencement of oral quinine therapy.

If severe complication(s) occur, intravenous artesunate (2.4 mg/kg bodyweight at 0, 12 and 24 hours) or quinine drips (10 mg/kg bodyweight 8 hourly) must immediately be given along with the required supportive treatments according to the hospital protocol. This will be recorded in a separate severe malaria.

**Terminal Eradication.** Primaquine **should not** be given to infants.

## 4. Statistical Analysis Plan

### **Objectives**

To assess the effectiveness of intermittent screening and treatment (ISTi) with dihydroartemisinin-piperaquine (DHP) administered at 2, 3, 4 and 9 months of age compared with the current practice of passive detection and treatment for malaria (PCD).

### **Research Question**

Does intermittent screening and treatment with DHP reduce the incidence of clinical malaria and the prevalence of malaria in the first year of life?

### **Study population**

The study population were infants born to pregnant women enrolled in the STOP MiP trial after the malaria in infancy study started (aged 0-12 months).

### **Inclusion criteria**

Healthy term newborns of consenting mothers living in study areas for the duration of follow-up.

### **Exclusion criteria**

Preterm (<37 weeks gestation) and sick newborns requiring hospitalization will be excluded from the study.

### **Trial intervention**

#### IST and PCD infants:

Clinical and anthropometry data were available at age 2, 3, 4, 6, 9 and 12 months of age

#### IST:

Laboratory data (malaria and Hb) were available at age 2, 3, 4, 6, 9 and 12 months of age

#### PCD:

Laboratory data (malaria and Hb) were available at 6 and 12 months of age and if symptomatic

### **Endpoints**

#### Primary:

1. Incidence of clinical malaria in the first 12 months of life
2. Prevalence of parasitaemia at 12 months of age

#### Secondary:

1. Prevalence of anaemia (Hb<10 g/dl) at 6 and 12 months of age

The above endpoints are compared between: IST and PCD group infants (adjusted for maternal intervention)

## **Definitions**

- **Clinical malaria:** defined as fever or history of fever in the previous 24 hours with asexual peripheral parasitaemia detected by microscopy and/or RDT.
- **Parasitaemia:** any asexual parasitaemia detected by microscopy, RDT or qPCR.
- **Patent parasitaemia:** any asexual parasitaemia detected by microscopy and/or RDT
- **Subpatent parasitaemia:** any asexual parasitaemia not detected by microscopy and/or RDT but detected by qPCR.
- **Anaemia:** haemoglobin concentration < 10 g/dl
- **Maternal parasitaemia:** any composite of parasitaemia during pregnancy and at delivery (including placental malaria) diagnosed by any methods (microscopy, RDT, LAMP/PCR) regardless of symptoms.
- **Maternal anaemia:** haemoglobin concentration < 10g/dl.
- **Maternal malnutrition:** mid upper arm circumference < 23.5 cm.
- **Maternal SES:** defined by Principal Component Analysis Methods.

## **Statistical Analysis**

### **Study flow chart**

The flow chart will present the number of infants enrolled and their outcome (loss to follow up, withdrawal consent, died, complete follow up) according to the infant's intervention arms.

### **Baseline Data and Characteristics**

This will be presented by intervention group (IST and PCD). Nominal variables will be presented as N (%) and continuous variables will be presented as mean/median (SD/interquartile range) as appropriate.

Baseline variables include: those of the infant (sex, birth weight, cord haemoglobin concentration, and cord malaria) and mother (age, parity, SES, education, maternal intervention group, maternal parasitaemia at enrolment, during pregnancy and at delivery, maternal haemoglobin level and anaemia at enrolment and delivery and maternal nutritional status for the SST/IST/IPT trial of mothers [Ahmed R et al. Lancet ID 2019]).

### **Primary outcome analysis**

#### **1. Adjusted Incidence Rate Ratio of clinical malaria in infants between IST and PCD group.**

The adjusted incidence rate ratio (IRR, 95%CI) of clinical malaria in the first year of life will be compared between IST and PCD group using mixed-effects Poisson regression analysis. Other covariates will be included in the multivariable analysis:

- Maternal (intervention group, parasitaemia at enrolment and during pregnancy, SES (low/medium/high))
- Infant (sex)

## **2. Adjusted Prevalence Ratios of parasitaemia at 12 months between IST and PCD group**

The adjusted prevalence ratios (aPR, 95%CI) of parasitaemia at age 12 months will be compared between IST and PCD group using log binomial regression analysis. Other covariates in the multivariable analysis include:

- Maternal (intervention group, parasitaemia at enrolment or during pregnancy, SES (low/medium/high))
- Infant (sex)

### **Secondary outcome analysis**

#### **1. Adjusted Prevalence Ratios of having anaemia at 6 and 12 months between IST and PCD group**

The adjusted prevalence ratios (aPR, 95%CI) of having anaemia at age 6 and 12 months will be compared between IST and PCD group using log binomial regression analysis. Other covariates will be included in the multivariable analysis:

- Maternal (intervention group, parasitaemia at enrolment and during pregnancy, SES (low/medium/high), anaemia and nutritional status)
- Infant (sex)

## 5. Severe Adverse Events

**Table 1. Deaths**

| No | Study ID              | Intervention Arm | Sex | Age (months) | Cause of death                                                                                                                                                                       | Outcome Notes | Assessment of causality to study drug and study intervention |
|----|-----------------------|------------------|-----|--------------|--------------------------------------------------------------------------------------------------------------------------------------------------------------------------------------|---------------|--------------------------------------------------------------|
| 1  | 1.16.011              | PCD              | M   | 7.2          | Severe sepsis due to acute enteritis                                                                                                                                                 | Died          | Unrelated                                                    |
| 2  | 1.02.033              | IST              | M   | 3.3          | Heart failure due to severe congenital heart disease (late manifestation) and sepsis                                                                                                 | Died          | Unrelated                                                    |
| 3  | 1.10.005*             | IST              | M   | 8.3          | Tuberculous Meningitis, marasmus and severe dehydration                                                                                                                              | Died          | Unrelated                                                    |
| 4  | 1.08.008              | PCD              | F   | 12.3         | Suspected Child Abuse                                                                                                                                                                | Died          | Unrelated                                                    |
| 5  | 1.19.014              | PCD              | M   | 3.0          | Respiratory Failure due to suspected Bronchopneumonia                                                                                                                                | Died          | Unrelated                                                    |
| 6  | 1.12.021 <sup>#</sup> | IST              | M   | 2.5          | <u>Died at home:</u> Fever for 7 days (malaria status unknown)                                                                                                                       | Died          | Unrelated                                                    |
| 7  | 1.18.011              | IST              | F   | 9.3          | Sepsis due to acute enteritis with severe dehydration and Bronchopneumonia                                                                                                           | Died          | Unrelated                                                    |
| 8  | 1.11.010              | PCD              | M   | 7.5          | Severe Bronchopneumonia, Cerebral Palsy, Neurodevelopmental Delay                                                                                                                    | Died          | Unrelated                                                    |
| 9  | 1.21.015              | PCD              | M   | 9.5          | Dyspnoe due to Severe Bronchopneumonia, Metabolic acidosis, Suspected Meningitis DD/ space occupying lesion and septic shock and electrolyte imbalance (secondary hiperpotassemia ). | Died          | Unrelated                                                    |



|    |          |     |   |      |                                                                                                                                                                                        |      |           |
|----|----------|-----|---|------|----------------------------------------------------------------------------------------------------------------------------------------------------------------------------------------|------|-----------|
| 10 | 1.07.037 | IST | M | 4.8  | Bronchopneumonia DD/ Pertusis with sepsis, Heart failure due to Congenital Heart Disease, Labiopalatoschisis                                                                           | Died | Unrelated |
| 11 | 1.16.026 | PCD | F | 7.7  | Acute Watery Diarrhea (dehydration status unknown)                                                                                                                                     | Died | Unrelated |
| 12 | 1.16.031 | PCD | F | 11.7 | Acute Watery Diarrhea with severe dehydration, Sepsis DD/ Encephalopathy, Hipoglycemia, Acute Kidney Injury                                                                            | Died | Unrelated |
| 13 | 1.16.035 | PCD | M | 8.9  | Vomiting with moderate dehydration due to cholestasis jaundice, cardiac and respiratory failure, cerebral herniation, intracranial bleeding due to hemorrhagic disease of the newborn. | Died | Unrelated |

Notes: \* this infant was admitted two times and left against medical advice, the third admission ended in death. For hospital admissions details please see table 3. #the mother did not bring the infant to health facility and died at home.

**Table 2. Hospitalization with Malaria**

| No | Study ID | Intervention Arm | Sex | Age (months) | Clinical Assessment                                                                                            | Outcome Notes | Assessment of causality to study drug and study intervention |
|----|----------|------------------|-----|--------------|----------------------------------------------------------------------------------------------------------------|---------------|--------------------------------------------------------------|
| 1  | 1.19.003 | PCD              | M   | 2.1          | Vivax malaria and anaemia (Hb 6.8 g/dl)                                                                        | Recovered     | Unrelated                                                    |
| 2  | 1.13.003 | IST              | F   | 1.5          | Vivax malaria and severe anaemia (Hb 4.1 g/dl)                                                                 | Recovered     | Unrelated                                                    |
| 3  | 1.06.026 | PCD              | F   | 6.8          | Falciparum malaria and hyperpyrexia (t 41 <sup>0</sup> C)                                                      | Recovered     | Unrelated                                                    |
| 4  | 1.21.027 | PCD              | F   | 9.7          | Malaria Mix, Acute Watery Diarhea moderate dehydration, electrolyte imbalance, oral candidiasis, malnutrition. | Recovered     | Unrelated                                                    |

**Table 3. Hospitalization without malaria**

| No | Study ID     | Intervention Arm | Sex | Age (months) | Clinical Assessment                                                      | Outcome Notes                               | Assessment of causality to study drug and study intervention |
|----|--------------|------------------|-----|--------------|--------------------------------------------------------------------------|---------------------------------------------|--------------------------------------------------------------|
| 1  | 1.16.001     | PCD              | M   | 4.5          | Sepsis due to acute enteritis                                            | Recovering                                  | Unrelated                                                    |
| 2  | 1.07.001     | IST              | F   | 6.6          | Measles and Bronchopneumonia                                             | Recovering                                  | Unrelated                                                    |
| 3  | 1.16.008     | PCD              | F   | 2.2          | Bronchopneumonia                                                         | Recovering                                  | Unrelated                                                    |
| 4  | 1.21.003 (1) | PCD              | F   | 4.6          | Measles and Bronchopneumonia                                             | Recovering                                  | Unrelated                                                    |
| 5  | 1.21.003 (2) | PCD              | F   | 7.4          | Bronchopneumonia, acute enteritis and some dehydration                   | Recovering                                  | Unrelated                                                    |
| 6  | 1.05.008     | PCD              | M   | 6.8          | Acute diarrhea with some dehydration                                     | Recovering                                  | Unrelated                                                    |
| 7  | 1.07.009     | IST              | M   | 7.8          | Acute diarrhea with some dehydration                                     | Recovering                                  | Unrelated                                                    |
| 8  | 1.10.005 (1) | IST              | M   | 6.6          | Tuberculous Meningitis, pulmonary TB and marasmus                        | Leave against medical advice: not recovered | Unrelated                                                    |
| 9  | 1.10.005 (2) | IST              | M   | 7.0          | Tuberculous Meningitis, pulmonary TB and marasmus and severe dehydration | Leave against medical advice: not recovered | Unrelated                                                    |
| 10 | 1.08.014     | PCD              | F   | 4.8          | Bilateral cataracts in infancy                                           | Not recovered                               | Unrelated                                                    |
| 11 | 1.13.011     | IST              | M   | 2.1          | Urinary retention due to phymosis and complex febrile convulsion         | Recovering                                  | Unrelated                                                    |
| 12 | 1.12.004     | IST              | M   | 12.9         | Bronchial Asthma severe attack                                           | Recovering                                  | Unrelated                                                    |
| 13 | 1.01.030     | PCD              | M   | 4.4          | Bronchopneumonia, bronchiolitis and acute watery diarrhea                | Recovering                                  | Unrelated                                                    |
| 14 | 1.07.023     | IST              | F   | 6.8          | Bronchopneumonia                                                         | Recovering                                  | Unrelated                                                    |

|    |          |     |   |      |                                                                                                                                                                |               |           |
|----|----------|-----|---|------|----------------------------------------------------------------------------------------------------------------------------------------------------------------|---------------|-----------|
| 15 | 1.05.042 | PCD | M | 2.8  | Sepsis due to Bronchopneumonia,                                                                                                                                | Recovering    | Unrelated |
| 16 | 1.07.039 | IST | M | 4.2  | Bronchopneumonia and hypochromic-microcytic anaemia                                                                                                            | Recovered     | Unrelated |
| 17 | 1.12.020 | IST | M | 2.8  | Bronchiolitis                                                                                                                                                  | Recovered     | Unrelated |
| 18 | 1.16.023 | PCD | M | 5.6  | Bronchopneumonia                                                                                                                                               | Recovered     | Unrelated |
| 19 | 1.16.032 | PCD | F | 3.7  | Bronchopneumonia                                                                                                                                               | Recovered     | Unrelated |
| 20 | 1.18.033 | IST | M | 4.6  | Urosepsis, Cholestasis Jaundice due to Suspected Billiary atresia With Liver failure, Candidiasis Oral                                                         | Not recovered | Unrelated |
| 21 | 1.05.042 | PCD | M | 3.0  | Sepsis due to Bronchopneumonia, Left Pulmonary Atelectasis, hypochromic microcytic anaemia: iron deficiency                                                    | Recovering    | Unrelated |
| 22 | 1.04.042 | PCD | F | 4.5  | Sepsis due to diarrhea with moderate dehydration, common cold                                                                                                  | Recovered     | Unrelated |
| 23 | 1.07.022 | IST | M | 6.8  | Meningitis tuberculosis (mixed purulent bacterial meningitis) on oral antituberculosis, with developmental disorder, Pneumonia, hypochromic microcytic anaemia | Recovering    | Unrelated |
| 24 | 1.14.016 | PCD | F | 7.6  | Acute diarrhea with mild-moderate dehydration                                                                                                                  | Recovered     | Unrelated |
| 25 | 1.05.017 | PCD | M | 12.9 | Bronchiolitis                                                                                                                                                  | Recovered     | Unrelated |
| 26 | 1.03.024 | IST | M | 2.1  | Bronchopneumonia                                                                                                                                               | Recovered     | Unrelated |
| 27 | 1.21.025 | PCD | F | 2.0  | Constipation due to suspected anal stenosis                                                                                                                    | Recovering    | Unrelated |
| 28 | 1.03.024 | IST | M | 4.0  | Bronchial asthma, mild attack rare episode, Bronchopneumonia, hypochromic microcytic anaemia due to suspected iron deficiency                                  | Recovering    | Unrelated |

|    |          |     |   |      |                                                                                                                            |            |           |
|----|----------|-----|---|------|----------------------------------------------------------------------------------------------------------------------------|------------|-----------|
| 29 | 1.02.032 | IST | M | 4.4  | Simple Fibrile seizures due to common cold, Phimosi, Stomatiti                                                             | Recovered  | Unrelated |
| 30 | 1.14.007 | PCD | M | 12.1 | Acute watery diarrhea with severe dehydration, common cold                                                                 | Recovered  | Unrelated |
| 31 | 1.16.032 | PCD | F | 4.2  | Bronchial asthma, rare episode mild attack, Bronchopneumonia dd/Lung TB , Suspected PDA DD/ VSD decompensata, Malnutrition | Recovering | Unrelated |
| 32 | 1.16.034 | PCD | M | 4.5  | Bronchopneumonia, Hypochromic microcytic anaemia, Malnutrition                                                             | Recovering | Unrelated |
| 33 | 1.18.038 | IST | F | 6.4  | Acute Watery Diarrhea with Common Cold                                                                                     | Recovering | Unrelated |
| 34 | 1.07.035 | IST | M | 9.0  | Chronic suppurative otitis media auricula dextra et sinistra, Bronchopneumonia, falciparum malaria with hiperparasitemia   | Recovered  | Unrelated |
| 35 | 1.06.072 | PCD | F | 7.3  | Urosepsi, Common cold                                                                                                      | Recovered  | Unrelated |
| 36 | 1.12.023 | IST | F | 6.9  | Chronic gastroenteriti, electrolyte imbalance, Oral candidiasis, Pneumonia                                                 | Recovered  | Unrelated |
| 37 | 1.20.022 | IST | F | 11.9 | Simple Febrile Seizures, acute Gastroenteriti                                                                              | Recovered  | Unrelated |
| 38 | 1.15.032 | IST | M | 5.1  | Rhinopharyngiti due to bacterial Infection                                                                                 | Recovered  | Unrelated |
| 39 | 1.03.029 | IST | F | 10.1 | Bronchioliti, suspected sepsi                                                                                              | Recovered  | Unrelated |

## 6. Maternal Malaria Table

|                                                           | PCD           | IST           | Total         |
|-----------------------------------------------------------|---------------|---------------|---------------|
| <b>ANC</b>                                                |               |               |               |
| Peripheral parasitaemia (microscopy) at ANC               | 57/444 (13%)  | 42/313 (13%)  | 99/757 (13%)  |
| Peripheral parasitaemia (RDT) at ANC                      | 25/244 (10%)  | 12/193 (6.2%) | 37/437 (8.5%) |
| Peripheral parasitaemia (PCR) at ANC                      | 101/444 (23%) | 68/313 (22%)  | 169/757 (22%) |
| Peripheral parasitaemia (any methods) at ANC              | 132/444 (30%) | 89/313 (28%)  | 221/757 (29%) |
| Peripheral Pf parasitaemia (any methods) at ANC           | 92/444 (21%)  | 61/313 (19%)  | 153/757 (20%) |
| Peripheral Pv parasitaemia (any methods) at ANC           | 92/444 (21%)  | 57/313 (18%)  | 149/757 (20%) |
| <b>At delivery (peripheral)</b>                           |               |               |               |
| Peripheral parasitaemia (microscopy) at delivery          | 14/340 (4.1%) | 8/223 (3.6%)  | 22/563 (3.9%) |
| Peripheral parasitaemia (RDT) at delivery                 | 9/400 (2.3%)  | 6/284 (2.1%)  | 15/684 (2.2%) |
| Peripheral parasitaemia (PCR) at delivery                 | 38/400 (9.5%) | 24/284 (8.5%) | 62/684 (9.1%) |
| Peripheral parasitaemia (any method) at delivery          | 46/400 (12%)  | 29/284 (10%)  | 75/684 (11%)  |
| Peripheral Pf parasitaemia (any method) at delivery       | 30/400 (7.5%) | 16/283 (5.7%) | 46/683 (6.7%) |
| Peripheral Pv parasitaemia (any method) at delivery       | 35/399 (8.8%) | 18/284 (6.3%) | 53/683 (7.8%) |
| <b>At delivery (placental)</b>                            |               |               |               |
| Placental malaria (microscopy) at delivery                | 14/340 (4.1%) | 8/223 (3.6%)  | 22/563 (3.9%) |
| Placental malaria (RDT) at delivery                       | 10/380 (2.6%) | 7/273 (2.6%)  | 17/653 (2.6%) |
| Placental malaria (PCR) at delivery                       | 30/378 (7.9%) | 16/270 (5.9%) | 46/648 (7.1%) |
| Placental malaria (any method) at delivery                | 50/381 (13%)  | 32/274 (12%)  | 82/655 (13%)  |
| Placental Pf infection (any method) at delivery           | 22/399 (5.5%) | 11/282 (3.9%) | 33/681 (4.8%) |
| Placental Pv infection (any method) at delivery           | 31/401 (7.7%) | 16/283 (5.7%) | 47/684 (6.9%) |
| Any placental or peripheral malaria infection at delivery | 78/401 (19%)  | 50/285 (18%)  | 128/686 (19%) |
